# Supplementary material for: Modeling the Multiple Facets of Speciation-with-Gene-Flow toward Inferring the Divergence History of Lake Whitefish Species Pairs (Coregonus clupeaformis)
Source: PubMed Central journal article supplement — Genome Biol Evol. 2017 Aug 2;9(8):2057–74. doi: 10.1093/gbe/evx150 (PMC5737413; doi:10.1093/gbe/evx150), 2017-08-02
Supplement: evx150_supptable.pdf [file evx150_supptable.pdf]

### Supplementary Table S1. Results of model fitting.

For all lakes, details of statistics and demographic parameter values for the fittest models determined under the threshold of  $\Delta AIC_i < 10$ . The table contains in this order the maximum likelihood (MLE) for each model, the value of Akaike information criterion (AIC), the  $\Delta AIC$  value and the weighted AIC ( $w_{AIC}$ ). Then, the inferred raw demographic parameter values including: Theta ( $\theta$ ); the ancestral effective population size before population split ( $N_{ref}$ ); the effective population size after split for dwarf ( $N_1$ ) and normal ( $N_2$ ) populations; the growth coefficient for dwarf ( $b_1$ ) and normal ( $b_2$ ) populations. The  $b$  parameter is defined as the ratio of contemporary to ancestral effective population size (ancestral meaning after splitting time). Population exponential growth is associated with  $b_i > 1$  and reduction in population effective size with  $b_i < 1$ . The Hill-Robertson factor ( $hrf$ ) corresponds to the degree to which the effective population size of the diverging populations (not considering the ancestral population) is locally reduced due to the effect of linked selection. Migration parameters include migration rates from normal population to dwarf population ( $m_{e12}$ ) and reciprocally ( $m_{e21}$ ), and a second category of effective migration rates ( $m'_{e12}$ ) and ( $m'_{e21}$ ) applying to a second category of loci. Time parameters include the duration (in years) of the allopatric divergence period ( $T_{split}$ ), and the duration of the migration period (*i.e.*,  $T_{AM}$  for the AM models and  $T_{SC}$  for the secondary contact models). Finally, the table also contains proportion parameters such as the proportion ( $Q$ ) of the genome with effective population sizes  $N_1$  and  $N_2$  (a second category of loci occupying a fraction  $1-Q$  of the genome has effective population sizes  $b_1 N_1$  and  $b_2 N_2$ ). A proportion ( $P$ ) of the genome is occupied by loci with effective migration rates  $m_{e12}$  and  $m_{e21}$  (and a second category of loci occupying a fraction  $1-P$  of the genome has effective population sizes  $m'_{e12}$  and  $m'_{e21}$ ). The parameter ( $O$ ) is the proportion of correct SNP orientation. Numbers into brackets denote 95% confidence intervals obtained using the MLE parameter values  $\pm 2$  s.e.

| LAKE        | MODEL   | MLE      | AIC     | $\Delta$ AIC | wAIC | $\theta$ | Nref    | $N_1$         | $N_2$        | $b_1$         | $b_2$         | hrf        | $m_{h,12}$       | $m_{h,21}$       | $m_{h,12}$     | $m_{h,21}$      | Tsplit       | Tpost-split  | P            | Q            | O            |
|-------------|---------|----------|---------|--------------|------|----------|---------|---------------|--------------|---------------|---------------|------------|------------------|------------------|----------------|-----------------|--------------|--------------|--------------|--------------|--------------|
| Témiscouata | SC2mG   | -1656.47 | 3336.93 | -            | 0.68 | 532.15   | 7611.39 | 110.8         | 42.1         | 20.3          | 0.3           | -          | 0.011            | 0.000            | 0.000          | 0.042           | 0.56         | 0.14         | 0.93         | -            | 0.99         |
|             |         |          |         |              |      |          |         | [32.7; 189.0] | [0.0; 84.6]  | [0.0; 68.6]   | [0.0; 32.4]   | -          | [0.000; 21.107]  | [0.000; 21.680]  | [0.000; 3.610] | [0.000; 3.858]  | [0.00; 3.39] | [0.00; 0.91] | [0.22; 0.95] | -            | [0.99; 0.99] |
| Témiscouata | SIG     | -1663.23 | 3338.47 | 1.54         | 0.32 | 570.56   | 4350.13 | 33.4          | 49.2         | 95.4          | 0.2           | -          | -                | -                | -              | -               | 0.97         | -            | -            | -            | 0.99         |
|             |         |          |         |              |      |          |         | [21.7; 45.0]  | [47.1; 51.4] | [81.0; 109.8] | [0.0; 1.5]    | -          | -                | -                | -              | -               | [0.91; 1.02] | -            | -            | -            | [0.84; 0.99] |
| East        | SC2N2mG | -909.87  | 1847.74 | -            | 0.77 | 212.86   | 1622.96 | 0.4           | 0.4          | 37.0          | 2.2           | 0.1        | 18.900           | 37.344           | 1.979          | 1.249           | 3.16         | 1.73         | 0.60         | 0.16         | 0.98         |
|             |         |          |         |              |      |          |         | [0.0; 9.5]    | [0.0; 6.8]   | [0.0; 104.7]  | [0.0; 41.1]   | [0.0; 0.6] | [7.861; 29.940]  | [15.639; 59.050] | [0.000; 7.340] | [0.000; 5.661]  | [0.00; 7.50] | [0.93; 2.52] | [0.26; 0.94] | [0.01; 0.37] | [0.96; 0.98] |
| East        | IM2mG   | -914.25  | 1850.50 | 2.77         | 0.19 | 982.85   | 7493.63 | 1.0           | 0.1          | 1.8           | 84.9          | -          | 14.780           | 0.007            | 0.046          | 5.821           | 0.28         | -            | 0.77         | -            | 0.97         |
|             |         |          |         |              |      |          |         | [0.0; 2.2]    | [0.0; 1.2]   | [0.0; 3.7]    | [82.1; 87.7]  | -          | [14.570; 14.991] | [0.000; 4.195]   | [0.000; 0.546] | [5.493; 6.148]  | [0.00; 0.65] | -            | [0.59; 0.95] | -            | [0.94; 0.99] |
| East        | AM2N2m  | -916.30  | 1856.60 | 7.71         | 0.02 | 406.95   | 3102.73 | 8.6           | 4.3          | -             | -             | 0.0        | 26.409           | 2.112            | 0.001          | 4.454           | 0.19         | 0.00         | 0.06         | 0.50         | 0.96         |
|             |         |          |         |              |      |          |         | [0.0; 12.2]   | [0.0; 5.1]   | -             | -             | [0.0; 0.3] | [14.941; 37.877] | [0.000; 12.290]  | [0.000; 3.853] | [0.000; 12.517] | [0.06; 0.33] | [0.00; 0.13] | [0.87; 0.86] | [0.26; 0.74] | [0.96; 0.96] |
| East        | AMG     | -918.72  | 1855.45 | 8.86         | 0.01 | 775.93   | 5915.95 | 0.6           | 0.2          | 25.8          | 96.3          | -          | 11.344           | 0.037            | -              | -               | 0.21         | 0.04         | -            | -            | 0.96         |
|             |         |          |         |              |      |          |         | [0.0; 40.0]   | [0.0; 11.2]  | [7.0; 44.6]   | [53.6; 139.0] | -          | [0.260; 22.428]  | [0.000; 1.202]   | -              | -               | [0.08; 0.34] | [0.00; 0.15] | -            | -            | [0.95; 0.97] |
| Indian      | SC2N2mG | -1089.03 | 2206.07 | -            | 0.94 | 158.61   | 933.35  | 0.6           | 0.3          | 64.0          | 6.3           | 0.2        | 0.809            | 1.906            | 0.155          | 1.014           | 4.50         | 1.31         | 0.60         | 0.41         | 0.97         |
|             |         |          |         |              |      |          |         | [0.6; 0.6]    | [0.0; 2.7]   | [62.1; 65.9]  | [4.1; 8.6]    | [0.0; 0.4] | [0.000; 1.708]   | [1.053; 2.760]   | [0.000; 1.098] | [0.994; 1.033]  | [3.65; 5.35] | [0.96; 1.65] | [0.19; 0.95] | [0.39; 0.42] | [0.94; 1.00] |
| Indian      | SC2NG   | -1094.92 | 2211.85 | 5.78         | 0.05 | 1201.86  | 7072.67 | 0.2           | 0.2          | 43.2          | 4.4           | 0.2        | 1.676            | 5.703            | -              | -               | 0.13         | 0.34         | -            | 0.50         | 0.95         |
|             |         |          |         |              |      |          |         | [0.0; 28.7]   | [0.0; 70.8]  | [42.4; 44.0]  | [0.0; 77.7]   | [0.0; 0.4] | [0.000; 42.686]  | [0.000; 48.432]  | -              | -               | [0.11; 0.15] | [0.00; 8.00] | -            | [0.48; 0.50] | [0.29; 0.99] |
| Cliff       | SC2N2mG | -1006.59 | 2039.18 | -            | 0.53 | 123.06   | 1482.41 | 4.1           | 0.9          | 24.7          | 19.6          | 0.2        | 0.088            | 0.024            | 0.074          | 0.008           | 3.12         | 0.89         | 0.48         | 0.40         | 0.99         |
|             |         |          |         |              |      |          |         | [1.9; 6.4]    | [0.4; 1.4]   | [20.9; 28.5]  | [16.9; 22.3]  | [0.0; 1.0] | [0.000; 1.159]   | [0.000; 1.894]   | [0.000; 0.494] | [0.000; 7.252]  | [2.79; 3.45] | [0.84; 0.94] | [0.36; 0.61] | [0.00; 2.17] | [0.98; 0.99] |
| Cliff       | SC2mG   | -1007.72 | 2039.43 | 0.25         | 0.46 | 232.67   | 2802.70 | 7.3           | 1.0          | 3.6           | 10.7          | -          | 14.629           | 34.813           | 0.085          | 0.006           | 0.65         | 0.49         | 0.05         | -            | 0.96         |
|             |         |          |         |              |      |          |         | [0.0; 53.0]   | [0.0; 12.1]  | [0.0; 132.8]  | [0.0; 86.9]   | -          | [0.000; 35.145]  | [14.934; 54.692] | [0.000; 3.306] | [0.000; 2.323]  | [0.11; 1.20] | [0.00; 0.99] | [0.00; 0.26] | -            | [0.95; 0.97] |

**Supplementary Table 2. Converted model parameter values for the best fit models in each lake.**

For all lakes, details of statistics and demographic parameter values for the fittest models determined under the threshold of  $\Delta AIC_i < 10$ . The table contains in this order the maximum likelihood (MLE) for each model, the value of Akaike information criterion (AIC), the  $\Delta AIC$  value and the weighted AIC ( $w_{AIC}$ ). Then, the inferred demographic parameter values converted with the estimate of Theta ( $\theta$ ): the ancestral effective population size before population split ( $N_{ref}$ ); the effective population size after split for dwarf ( $N_1$ ) and normal ( $N_2$ ) populations; the growth coefficient for dwarf ( $b_1$ ) and normal ( $b_2$ ) populations. The  $b$  parameter defined as a ratio of contemporary to ancestral effective population size (ancestral meaning after splitting time). Population exponential growth is associated with  $b_i > 1$  and reduction in population effective size with  $b_i < 1$ . The Hill-Robertson factor ( $hrf$ ) corresponds to the degree to which the effective population size of the diverging populations (not considering the ancestral population) is locally reduced due to the effect of linked selection. Migration parameters include migration rates from normal population to dwarf population ( $m_{e12}$ ) and reciprocally ( $m_{e21}$ ), and a second category of effective migration rates ( $m'_{e12}$ ) and ( $m'_{e21}$ ) applying to a second category of loci. Time parameters include the duration (in years) of the allopatric divergence period ( $T_{split}$ ), and the duration of the migration period (*i.e.*,  $T_{AM}$  for the AM models and  $T_{SC}$  for the secondary contact models). Finally, the table also contains proportion parameters such as the proportion ( $Q$ ) of the genome with effective population sizes  $N_1$  and  $N_2$  (a second category of loci occupying a fraction  $1-Q$  of the genome has effective population sizes  $b_1N_1$  and  $b_2N_2$ ). A proportion ( $P$ ) of the genome is occupied by loci with effective migration rates  $m_{e12}$  and  $m_{e21}$  (and a second category of loci occupying a fraction  $1-P$  of the genome has effective population sizes  $m'_{e12}$  and  $m'_{e21}$ ). The parameter ( $O$ ) is the proportion of correct SNP orientation. The estimated value of each parameter was converted so that migration rates represent the fraction of a population replaced

by migrants every generation, and temporal parameters appear in years. Numbers into brackets denote 95% confidence intervals obtained using the MLE parameter values  $\pm 2$  s.e.

| LAKE        | MODEL   | MLE      | AIC     | $\Delta$ AIC | wAIC | $\theta$ | Nref    | $N_1$                 | $N_2$                | $b_1$         | $b_2$         | hrf          | $m_{h1}$       | $m_{h2}$       | $m_{h3}$       | $m_{h4}$       | $m_{h5}$       | $T_{split}$          | $T_{post-split}$     | P            | Q            | O            |
|-------------|---------|----------|---------|--------------|------|----------|---------|-----------------------|----------------------|---------------|---------------|--------------|----------------|----------------|----------------|----------------|----------------|----------------------|----------------------|--------------|--------------|--------------|
| Témiscouata | SC2mG   | -1656.47 | 3336.93 | -            | 0.68 | 532.15   | 7611.39 | 2952603.4             | 1120233.2            | 20.3          | 0.3           | -            | 0.000          | 0.000          | 0.000          | 0.000          | 0.000          | 29996.49             | 7246.04              | 0.93         | -            | 0.99         |
|             |         |          |         |              |      |          |         | [870315.0; 5034891.7] | [266.4; 2253288.1]   | [0.0; 68.6]   | [0.0; 32.4]   | -            | [0.000; 0.005] | [0.000; 0.005] | [0.000; 0.001] | [0.000; 0.001] | [0.000; 0.001] | [0.00; 180578.93]    | [0.00; 48478.87]     | [0.22; 0.95] | -            | [0.99; 0.99] |
| Témiscouata | SIG     | -1663.23 | 3338.47 | 1.54         | 0.32 | 570.56   | 4350.13 | 507815.2              | 749808.8             | 95.4          | 0.2           | -            | -              | -              | -              | -              | -              | 29506.96             | -                    | -            | -            | 0.99         |
|             |         |          |         |              |      |          |         | [330990.9; 684639.4]  | [717244.8; 782372.8] | [81.0; 109.8] | [0.0; 1.5]    | -            | -              | -              | -              | -              | -              | [48741.01; 31157.00] | -                    | -            | -            | [0.84; 0.99] |
| East        | SC2N2mG | -909.87  | 1847.74 | -            | 0.77 | 212.86   | 1622.96 | 2325.3                | 2453.9               | 37.0          | 2.2           | 0.11         | 0.020          | 0.040          | 0.002          | 0.001          | 0.001          | 35907.02             | 19601.58             | 0.60         | 0.16         | 0.98         |
|             |         |          |         |              |      |          |         | [56.8; 54009.3]       | [56.8; 38360.6]      | [0.0; 104.7]  | [0.0; 41.1]   | [0.01; 0.56] | [0.008; 0.032] | [0.017; 0.064] | [0.000; 0.008] | [0.000; 0.006] | [0.000; 0.006] | [0.00; 85224.95]     | [10542.92; 28660.24] | [0.26; 0.94] | [0.01; 0.37] | [0.96; 0.98] |
| East        | IM2mG   | -914.25  | 1850.50 | 2.77         | 0.19 | 982.85   | 7493.63 | 27310.7               | 2249.4               | 1.8           | 84.9          | -            | 0.003          | 0.000          | 0.000          | 0.001          | 0.001          | 14587.50             | -                    | 0.77         | -            | 0.97         |
|             |         |          |         |              |      |          |         | [262.3; 57150.4]      | [262.3; 30703.2]     | [0.0; 3.7]    | [82.1; 87.7]  | -            | [0.000; 0.004] | [0.000; 0.001] | [0.000; 0.000] | [0.001; 0.001] | [0.001; 0.001] | [0.00; 33933.42]     | -                    | [0.59; 0.95] | -            | [0.94; 0.99] |
| East        | AM2N2m  | -916.30  | 1856.60 | 7.71         | 0.02 | 406.95   | 3102.73 | 93159.0               | 47124.4              | -             | -             | 0.04         | 0.015          | 0.001          | 0.000          | 0.003          | 0.003          | 4204.02              | 0.00                 | 0.06         | 0.50         | 0.96         |
|             |         |          |         |              |      |          |         | [108.6; 131971.6]     | [108.6; 55127.0]     | -             | -             | [0.01; 0.34] | [0.008; 0.021] | [0.000; 0.007] | [0.000; 0.002] | [0.000; 0.007] | [0.000; 0.007] | [3263.59; 7077.67]   | [0.00; 2730.24]      | [0.87; 0.86] | [0.26; 0.74] | [0.96; 0.96] |
| East        | AMG     | -918.72  | 1855.45 | 8.86         | 0.01 | 775.93   | 5915.95 | 12292.9               | 4330.7               | 25.8          | 96.3          | -            | 0.003          | 0.000          | -              | -              | -              | 8725.63              | 1536.75              | -            | -            | 0.96         |
|             |         |          |         |              |      |          |         | [207.1; 827979.7]     | [207.1; 232806.3]    | [7.0; 44.6]   | [53.6; 139.0] | -            | [0.000; 0.007] | [0.000; 0.000] | -              | -              | -              | [4276.72; 14127.48]  | [0.00; 6368.43]      | -            | -            | [0.95; 0.97] |
| Indian      | SC2N2mG | -1089.03 | 2206.07 | -            | 0.94 | 158.61   | 933.35  | 2048.1                | 957.3                | 64.0          | 6.3           | 0.20         | 0.002          | 0.004          | 0.000          | 0.002          | 0.002          | 29401.99             | 8541.27              | 0.60         | 0.41         | 0.97         |
|             |         |          |         |              |      |          |         | [1984.1; 2112.1]      | [32.7; 8971.6]       | [62.1; 65.9]  | [4.1; 8.6]    | [0.01; 0.43] | [0.000; 0.003] | [0.002; 0.005] | [0.000; 0.002] | [0.002; 0.002] | [0.002; 0.002] | [23833.27; 34970.72] | [6279.02; 10803.53]  | [0.19; 0.95] | [0.39; 0.42] | [0.94; 1.00] |
| Indian      | SC2NG   | -1094.92 | 2211.85 | 5.78         | 0.05 | 1201.86  | 7072.67 | 5306.7                | 4851.4               | 43.2          | 4.4           | 0.19         | 0.000          | 0.001          | -              | -              | -              | 6230.14              | 16705.74             | -            | 0.50         | 0.95         |
|             |         |          |         |              |      |          |         | [247.5; 709280.9]     | [247.5; 1753775.2]   | [42.4; 44.0]  | [0.0; 77.7]   | [0.01; 0.38] | [0.000; 0.011] | [0.000; 0.012] | -              | -              | -              | [5259.77; 7200.51]   | [0.00; 396069.76]    | -            | [0.48; 0.50] | [0.29; 0.99] |
| Cliff       | SC2N2mG | -1006.59 | 2039.18 | -            | 0.53 | 123.06   | 1482.41 | 21376.3               | 4560.6               | 24.7          | 19.6          | 0.17         | 0.000          | 0.000          | 0.000          | 0.000          | 0.000          | 32375.74             | 9245.76              | 0.48         | 0.40         | 0.99         |
|             |         |          |         |              |      |          |         | [9640.8; 33111.8]     | [198.24; 7138.8]     | [20.9; 28.5]  | [16.9; 22.3]  | [0.00; 1.00] | [0.000; 0.001] | [0.000; 0.002] | [0.000; 0.001] | [0.000; 0.001] | [0.000; 0.001] | [28981.58; 35769.90] | [8722.07; 9769.46]   | [0.36; 0.61] | [0.00; 2.17] | [0.98; 0.99] |
| Cliff       | SC2mG   | -1007.72 | 2039.43 | 0.25         | 0.46 | 232.67   | 2802.70 | 71589.0               | 9480.8               | 3.6           | 10.7          | -            | 0.009          | 0.022          | 0.000          | 0.000          | 0.000          | 12818.87             | 9679.91              | 0.05         | -            | 0.96         |
|             |         |          |         |              |      |          |         | [98.1; 519641.2]      | [98.1; 118734.2]     | [0.0; 132.8]  | [0.0; 86.9]   | -            | [0.000; 0.022] | [0.009; 0.034] | [0.000; 0.002] | [0.000; 0.001] | [0.000; 0.001] | [2190.82; 23446.92]  | [0.00; 19505.76]     | [0.00; 0.26] | -            | [0.95; 0.97] |

**Supplementary Table S3. Summary statistics and parameter estimations for the 26 models per lake.**

For all lakes, summary statistics and model parameter values are provided for the fittest run obtained from 25 independent runs of optimisation for each model for each lake. Models are ranked according to their Akaike information criterion (AIC) value. Also provided are the  $\Delta AIC$  value for the corresponding model and the weighted AIC ( $w_{AIC}$ ). Inferred demographic parameter values are scaled by Theta ( $\theta$ ): the ancestral effective population size before population split ( $N_{ref}$ ); the effective population size after split for dwarf ( $N_1$ ) and normal ( $N_2$ ) populations; the growth coefficient for dwarf ( $b_1$ ) and normal ( $b_2$ ) populations; the Hill-Robertson factor ( $hrf$ ); effective migrations rates from normal population to dwarf population ( $m_{e12}$ ) and reciprocally ( $m_{e21}$ ) for the first category of loci, and for the second category ( $m_{e'12}$  and  $m_{e'21}$ ); Allopatric isolation duration parameter ( $T_s$ ) and migration duration parameters ( $T_{AM}$  for AM models and  $T_{SC}$  for SC models). Finally, the table also contains proportion parameters for the effect of linked selection ( $Q$ ), semi-permeability ( $P$ ) and correct orientation ( $O$ ).

| LAKE        | MODEL   | MLE      | AIC     | THETA   | nu1     | nu2    | b1      | b2     | hrf   | m12    | m21    | me12   | me21  | Tsplit | Tpost-split | P     | Q     | O     |       |
|-------------|---------|----------|---------|---------|---------|--------|---------|--------|-------|--------|--------|--------|-------|--------|-------------|-------|-------|-------|-------|
| TEMISCOUATA | SC2mG   | -1656,47 | 3336,93 | 532,15  | 110,834 | 42,051 | 20,263  | 0,255  | -     | 0,011  | 0,000  | 0,000  | 0,042 | 0,563  | 0,136       | 0,933 | -     | 0,990 |       |
| TEMISCOUATA | SIG     | -1663,23 | 3338,47 | 570,56  | 33,353  | 49,247 | 95,361  | 0,225  | -     | -      | -      | -      | -     | 0,969  | -           | -     | -     | 0,990 |       |
| TEMISCOUATA | SI2NG   | -1715,82 | 3447,64 | 570,30  | 50,758  | 25,073 | 42,398  | 0,679  | 0,012 | -      | -      | -      | -     | 1,000  | -           | -     | 0,014 | 0,989 |       |
| TEMISCOUATA | AMG     | -1718,01 | 3454,02 | 587,19  | 27,899  | 32,769 | 35,792  | 0,522  | -     | 0,092  | 0,867  | -      | -     | 0,003  | 0,934       | -     | -     | 0,989 |       |
| TEMISCOUATA | SC2N2m  | -1741,62 | 3507,24 | 440,01  | 0,339   | 97,904 | -       | -      | 0,209 | 5,078  | 56,919 | 1,410  | 0,734 | 7,082  | 0,507       | 0,715 | 0,445 | 0,990 |       |
| TEMISCOUATA | AM2N2mG | -1743,68 | 3515,36 | 271,69  | 57,220  | 70,037 | 3,750   | 0,097  | 0,024 | 8,188  | 0,012  | 1,331  | 0,000 | 0,627  | 0,402       | 0,527 | 0,027 | 0,988 |       |
| TEMISCOUATA | AM2m    | -1753,04 | 3526,08 | 564,13  | 205,612 | 18,805 | -       | -      | -     | 4,990  | 2,339  | 1,522  | 0,010 | 0,000  | 0,992       | 0,784 | -     | 0,989 |       |
| TEMISCOUATA | IM2mG   | -1752,97 | 3527,94 | 611,96  | 42,608  | 23,046 | 56,470  | 0,489  | -     | 0,000  | 13,899 | 0,060  | 0,006 | 0,879  | -           | 0,082 | -     | 0,990 |       |
| TEMISCOUATA | IMG     | -1761,00 | 3538,00 | 529,77  | 75,249  | 12,450 | 9,004   | 2,468  | -     | 0,093  | 0,022  | -      | -     | 1,166  | -           | -     | -     | 0,989 |       |
| TEMISCOUATA | SC2NG   | -1767,61 | 3557,21 | 661,81  | 87,355  | 23,160 | 28,158  | 0,141  | 0,953 | 0,464  | 0,025  | -      | -     | 0,586  | 0,128       | 0,020 | 0,990 | -     |       |
| TEMISCOUATA | AM2mG   | -1776,19 | 3576,38 | 571,39  | 20,183  | 28,587 | 22,612  | 0,691  | -     | 3,718  | 0,000  | 4,101  | 0,146 | 0,002  | 0,975       | 0,946 | -     | 0,990 |       |
| TEMISCOUATA | SI2N    | -1789,46 | 3590,92 | 601,11  | 98,815  | 22,679 | -       | 0,000  | 0,222 | -      | -      | -      | -     | 0,920  | -           | -     | -     | 0,996 |       |
| TEMISCOUATA | IM2NG   | -1804,32 | 3628,63 | 609,90  | 93,455  | 22,615 | 3,087   | 0,542  | 0,159 | 0,242  | 0,273  | -      | -     | 0,912  | -           | -     | 0,019 | 0,989 |       |
| TEMISCOUATA | IM2m    | -1813,77 | 3645,53 | 598,24  | 188,779 | 18,542 | -       | -      | -     | 0,411  | 0,044  | 0,123  | 0,316 | 0,953  | -           | 0,707 | -     | 0,989 |       |
| TEMISCOUATA | SI      | -1829,71 | 3667,43 | 574,92  | 94,643  | 18,965 | -       | -      | -     | -      | -      | -      | -     | 0,936  | -           | -     | -     | 0,990 |       |
| TEMISCOUATA | SC2N2mG | -1836,52 | 3701,04 | 327,43  | 60,519  | 13,571 | 15,374  | 0,844  | 0,543 | 0,302  | 0,304  | 0,000  | 0,062 | 0,000  | 0,796       | 0,586 | 0,055 | 0,990 |       |
| TEMISCOUATA | AM2N    | -1843,36 | 3704,72 | 595,25  | 77,826  | 18,625 | -       | -      | 0,541 | 4,287  | 0,000  | 0,360  | -     | 0,542  | -           | -     | 0,026 | 0,989 |       |
| TEMISCOUATA | SC2m    | -1846,09 | 3712,18 | 595,10  | 93,013  | 16,693 | -       | -      | -     | 8,002  | 1,324  | 0,031  | 0,011 | 0,873  | 0,000       | 0,271 | -     | 0,990 |       |
| TEMISCOUATA | AM      | -1864,87 | 3743,74 | 595,95  | 74,613  | 16,193 | -       | -      | -     | 0,288  | 0,017  | -      | -     | 0,823  | 0,063       | -     | -     | 0,990 |       |
| TEMISCOUATA | AM2N2m  | -1860,21 | 3744,42 | 282,46  | 89,717  | 19,353 | -       | -      | 0,370 | 0,584  | 0,000  | 12,295 | 0,968 | 0,928  | 0,058       | 0,210 | 0,079 | 0,990 |       |
| TEMISCOUATA | SC2N    | -1873,63 | 3765,26 | 641,56  | 116,008 | 14,745 | -       | -      | 0,236 | 1,821  | 2,407  | -      | -     | 0,763  | 0,000       | -     | 0,015 | 0,988 |       |
| TEMISCOUATA | SC      | -1896,33 | 3806,66 | 613,99  | 66,019  | 16,112 | -       | -      | -     | 0,033  | 0,000  | -      | -     | 0,008  | 0,805       | -     | -     | 0,989 |       |
| TEMISCOUATA | SCG     | -2061,74 | 4141,49 | 297,77  | 0,944   | 33,118 | 1,263   | 0,327  | 0,766 | 1,740  | -      | -      | -     | 4,064  | 0,792       | -     | -     | 0,986 |       |
| TEMISCOUATA | IM      | -2188,12 | 4388,24 | 677,45  | 21,798  | 11,870 | -       | -      | -     | 0,002  | 0,099  | -      | -     | 0,608  | -           | -     | -     | 0,988 |       |
| TEMISCOUATA | IM2N    | -2219,56 | 4455,12 | 402,78  | 1,776   | 16,341 | -       | -      | 0,679 | 0,225  | 1,297  | -      | -     | 3,911  | -           | -     | 0,069 | 0,990 |       |
| TEMISCOUATA | AM2NG   | -1865,58 | 3753,16 | 514,41  | 19,774  | 22,151 | 21,374  | 0,604  | 0,737 | 13,488 | 0,936  | -      | -     | 0,193  | 0,960       | -     | -     | 0,183 | 0,989 |
| EST         | SC2N2mG | -909,87  | 1847,74 | 212,86  | 0,409   | 0,432  | 36,967  | 2,193  | 0,110 | 18,900 | 37,344 | 1,979  | 1,249 | 3,161  | 1,725       | 0,599 | 0,156 | 0,984 |       |
| EST         | IM2mG   | -914,25  | 1850,50 | 982,85  | 1,041   | 0,086  | 1,795   | 84,878 | -     | 14,780 | 0,007  | 0,046  | 5,821 | 0,278  | -           | 0,768 | -     | 0,966 |       |
| EST         | AM2N2m  | -916,30  | 1856,60 | 406,95  | 8,579   | 4,339  | -       | -      | 0,035 | 26,409 | 2,112  | 0,001  | 4,454 | 0,194  | 0,000       | 0,056 | 0,498 | 0,962 |       |
| EST         | AMG     | -918,72  | 1855,45 | 775,93  | 0,594   | 0,209  | 25,827  | 96,319 | -     | 11,344 | 0,037  | -      | -     | 0,211  | 0,037       | -     | -     | 0,957 |       |
| EST         | IM2NG   | -920,00  | 1860,00 | 1068,61 | 8,096   | 0,081  | 0,071   | 73,507 | 0,254 | 13,887 | 0,922  | -      | -     | 0,275  | -           | -     | 0,010 | 0,972 |       |
| EST         | SC2mG   | -920,80  | 1865,61 | 700,13  | 6,957   | 8,791  | 8,089   | 0,011  | -     | 35,227 | 0,000  | 0,001  | 0,001 | 0,211  | 0,000       | 0,122 | -     | 0,966 |       |
| EST         | IMG     | -920,91  | 1857,82 | 1307,48 | 10,156  | 0,062  | 1307,48 | 85,351 | -     | 18,401 | 0,000  | -      | -     | 0,253  | -           | -     | -     | 0,975 |       |
| EST         | IM2m    | -922,37  | 1862,73 | 716,03  | 6,059   | 3,188  | -       | -      | -     | 55,951 | 63,428 | 0,029  | 0,089 | 0,138  | -           | 0,083 | -     | 0,958 |       |
| EST         | SC2NG   | -924,11  | 1870,23 | 718,50  | 18,325  | 6,174  | 0,245   | 0,467  | 0,157 | 0,424  | 0,046  | -      | -     | 0,007  | 0,146       | -     | 0,034 | 0,956 |       |
| EST         | IM2N    | -924,14  | 1864,27 | 721,19  | 10,103  | 4,114  | -       | -      | 0,173 | 0,296  | 0,000  | -      | -     | 0,161  | -           | -     | 0,043 | 0,961 |       |
| EST         | AM2N    | -924,18  | 1866,36 | 721,33  | 10,085  | 4,131  | -       | -      | 0,175 | 0,262  | 0,013  | -      | -     | 0,160  | 0,000       | -     | 0,043 | 0,961 |       |
| EST         | SC2N    | -924,19  | 1866,37 | 719,87  | 9,655   | 4,093  | -       | -      | 0,169 | 0,285  | 0,000  | -      | -     | 0,000  | 0,161       | -     | 0,035 | 0,961 |       |
| EST         | AM2N2mG | -924,31  | 1876,62 | 359,51  | 10,781  | 3,922  | 0,773   | 1,047  | 0,158 | 7,370  | 0,000  | 0,000  | 0,289 | 0,065  | 0,098       | 0,154 | 0,088 | 0,960 |       |
| EST         | SC2N2m  | -924,63  | 1873,26 | 359,42  | 7,863   | 4,033  | -       | -      | 0,156 | 0,546  | 0,000  | 0,000  | 0,813 | 0,000  | 0,160       | 0,948 | 0,058 | 0,959 |       |
| EST         | SI2NG   | -924,94  | 1865,89 | 723,07  | 32,541  | 2,415  | 0,318   | 2,523  | 0,193 | -      | -      | 0,164  | -     | -      | -           | -     | -     | 0,052 | 0,964 |
| EST         | AM2mG   | -925,37  | 1874,75 | 719,43  | 6,293   | 4,478  | 2,088   | 0,011  | -     | 0,134  | 0,015  | 0,258  | 0,015 | 0,149  | 0,000       | 0,060 | -     | 0,956 |       |
| EST         | SI2N    | -925,40  | 1862,80 | 721,98  | 10,477  | 4,096  | -       | 0,038  | 0,180 | -      | -      | 0,157  | -     | -      | -           | -     | -     | 0,961 |       |
| EST         | AM2NG   | -925,53  | 1873,07 | 725,91  | 8,357   | 1,973  | 3,403   | 3,704  | 0,205 | 25,737 | 0,000  | -      | -     | 0,000  | 0,169       | -     | 0,039 | 0,967 |       |
| EST         | SCG     | -925,97  | 1869,94 | 719,09  | 10,958  | 4,602  | 0,007   | 0,022  | -     | 2,111  | 0,499  | -      | -     | 0,135  | 0,002       | -     | -     | 0,950 |       |
| EST         | IM      | -926,81  | 1865,62 | 720,27  | 7,182   | 3,746  | -       | -      | -     | 0,218  | 0,000  | -      | -     | 0,154  | -           | -     | -     | 0,958 |       |
| EST         | AM      | -926,82  | 1867,64 | 719,72  | 7,444   | 3,690  | -       | -      | -     | 0,242  | 0,000  | -      | -     | 0,153  | 0,001       | -     | -     | 0,958 |       |
| EST         | SC2m    | -926,84  | 1873,68 | 720,18  | 7,229   | 3,754  | -       | -      | -     | 0,000  | 0,000  | 0,212  | 0,000 | 0,000  | 0,154       | 0,055 | -     | 0,958 |       |
| EST         | SC      | -926,92  | 1867,85 | 719,77  | 7,192   | 3,803  | -       | -      | -     | 0,201  | 0,000  | -      | -     | 0,021  | 0,133       | -     | -     | 0,959 |       |
| EST         | AM2m    | -927,00  | 1874,01 | 719,66  | 7,162   | 3,768  | -       | -      | -     | 0,001  | 0,213  | 0,125  | 0,370 | 0,129  | 0,024       | 0,937 | -     | 0,958 |       |
| EST         | SIG     | -927,30  | 1866,59 | 722,93  | 7,112   | 2,290  | 1,722   | 2,363  | -     | -      | -      | 0,159  | -     | -      | -           | -     | -     | 0,962 |       |
| EST         | SI      | -927,47  | 1862,94 | 721,02  | 7,842   | 3,692  | -       | -      | -     | -      | -      | 0,152  | -     | -      | -           | -     | -     | 0,959 |       |
| INDIAN      | SC2N2mG | -1089,03 | 2206,07 | 158,61  | 0,627   | 0,293  | 63,983  | 6,320  | 0,200 | 0,809  | 1,906  | 0,155  | 1,014 | 4,500  | 1,307       | 0,597 | 0,405 | 0,967 |       |
| INDIAN      | SC2NG   | -1094,92 | 2211,85 | 1201,86 | 0,214   | 0,196  | 43,187  | 4,390  | 0,185 | 1,676  | 5,703  | -      | -     | 0,126  | 0,337       | -     | -     | 0,497 | 0,954 |
| INDIAN      | IM2mG   | -1097,36 | 2216,72 | 1033,20 | 0,085   | 0,203  | 97,558  | 2,372  | -     | 0,747  | 12,454 | 0,999  | 2,161 | 0,378  | -           | 0,643 | -     | 0,963 |       |
| INDIAN      | IM2NG   | -1109,26 | 2238,51 | 789,68  | 1,418   | 0,539  | 10,748  | 7,966  | 0,108 | 0,959  | 2,400  | -      | -     | 0,331  | -           | -     | 0,494 | 0,953 |       |
| INDIAN      | AM2mG   | -1109,85 | 2243,70 | 1669,74 | 0,398   | 0,197  | 9,359   | 30,228 | -     | 0,000  | 29,521 | 15,486 | 0,010 | 0,420  | 0,109       | 0,411 | -     | 0,982 |       |
| INDIAN      | SC2N    | -1122,51 | 2263,02 | 727,32  | 5,482   | 2,295  | -       | -      | 0,130 | 2,220  | 4,670  | -      | -     | 0,214  | 0,048       | -     | 0,400 | 0,943 |       |
| INDIAN      | IM2N    | -1126,84 | 2269,67 | 739,28  | 5,336   | 2,056  | -       | -      | 0,122 | 1,051  | 3,508  | -      | -     | 0,313  | -           | -     | 0,498 | 0,941 |       |
| INDIAN      | SC2N2m  | -1122,87 | 2269,74 | 370,69  | 3,827   | 1,134  | -       | -      | 0,105 | 1,980  | 7,041  | 0,125  | 0,000 | 0,190  | 0,062       | 0,621 | 0,492 | 0,936 |       |
| INDIAN      | IMG     | -1126,89 | 2269,77 | 1027,58 | 0,087   | 0,088  | 99,196  | 4,902  | -     | 0,900  | 5,412  | -      | -     | -      | 0,398       | -     | -     | 0,963 |       |
| INDIAN      | AM2N    | -1126,60 | 2271,19 | 748,55  | 5,449   | 1,794  | -       | -      | 0,115 | 1,006  | 4,186  | 0,315  | -     | 0,000  | -           | -     | 0,499 | 0,938 |       |
| INDIAN      | AM2N2mG | -1129,46 | 2286,93 | 399,77  | 3,975   | 0,961  | 0,351   | 3,274  | 0,070 | 0,446  | 11,366 | 1,125  | 0,013 | 0,231  | 0,001       | 0,127 | 0,488 | 0,943 |       |
| INDIAN      | AMG     | -1135,33 | 2288,66 | 966,36  | 0,113   | 0,084  | 79,583  | 5,089  | -     | 0,809  | 5,715  | -      | -     | 0,397  | 0,000       | -     | -     | 0,955 |       |
| INDIAN      | AM2N2m  | -1133,39 | 2290,79 | 391,41  | 3,757   | 1,204  | -       | -      | 0,072 | 1,563  | 7,570  | 2,764  | 2,231 | 0,221  | 0,000       | 0,221 | 0,474 | 0,941 |       |
| INDIAN      | SC2mG   | -1147,39 | 2318,78 | 1066,86 | 0,338   | 6,184  | 34,144  | 0,010  | -     | 0,958  | 24,798 | 2,337  | 0,411 | 0,296  | 0,000       | 0,915 | 0,968 | -     |       |
| INDIAN      | SC2m    | -1152,52 | 2325,04 | 713,24  | 3,979   | 0,492  | -       | -      | -     | 0,103  | 56,955 | 1,354  | 4,513 | 0,199  | 0,024       | 0,346 | -     | 0,936 |       |
| INDIAN      | SI2NG   | -1157,17 | 2330,34 | 753,03  | 3,045   | 0,761  | 12,270  | 94,413 | 0,195 | -      | -      | -      | -     | 0,217  | -           | -     | 0,465 | 0,971 |       |
| INDIAN      | SCG     | -1165,06 | 2348,12 | 748,06  | 0,619   | 0,282  | 22,245  | 27,958 | -     | 0,851  | 1,145  | -      | -     | 0,055  | 0,228       | -     | -     | 0,959 |       |
| INDIAN      | IM2m    | -1166,24 | 2350,47 | 719,46  | 5,645   | 0,     |         |        |       |        |        |        |       |        |             |       |       |       |       |

|        |         |          |         |        |        |        |        |        |       |        |        |        |       |       |       |       |       |       |
|--------|---------|----------|---------|--------|--------|--------|--------|--------|-------|--------|--------|--------|-------|-------|-------|-------|-------|-------|
| INDIAN | SI2N    | -1184,54 | 2381,08 | 749,27 | 16,206 | 3,653  | -      | 0,489  | 0,147 | -      | -      | -      | -     | 0,179 | -     | -     | -     | 0,953 |
| INDIAN | SC      | -1194,61 | 2403,22 | 716,88 | 3,626  | 0,562  | -      | -      | -     | 1,152  | 5,477  | -      | -     | 0,173 | 0,047 | -     | -     | 0,935 |
| INDIAN | SIG     | -1205,58 | 2423,15 | 740,82 | 2,001  | 0,246  | 12,215 | 98,268 | -     | -      | -      | -      | -     | 0,222 | -     | -     | -     | 0,969 |
| INDIAN | IM      | -1210,16 | 2432,31 | 721,65 | 4,207  | 0,479  | -      | -      | -     | 0,272  | 3,566  | -      | -     | 0,219 | -     | -     | -     | 0,937 |
| INDIAN | AM      | -1210,17 | 2434,34 | 721,73 | 4,149  | 0,484  | -      | -      | -     | 0,281  | 3,520  | -      | -     | 0,218 | 0,000 | -     | -     | 0,936 |
| INDIAN | SI      | -1251,12 | 2510,25 | 752,25 | 5,634  | 0,868  | -      | -      | -     | -      | -      | -      | -     | 0,163 | -     | -     | -     | 0,946 |
| CLIFF  | SC2N2mG | -1006,59 | 2039,18 | 123,06 | 4,120  | 0,879  | 24,700 | 19,600 | 0,174 | 0,088  | 0,024  | 0,074  | 0,008 | 3,120 | 0,891 | 0,481 | 0,400 | 0,987 |
| CLIFF  | SC2mG   | -1007,72 | 2039,43 | 232,67 | 7,298  | 0,966  | 3,644  | 10,674 | -     | 14,629 | 34,813 | 0,085  | 0,006 | 0,653 | 0,049 | 0,055 | -     | 0,960 |
| CLIFF  | IM2mG   | -1012,75 | 2047,50 | 278,01 | 23,134 | 0,304  | 3,579  | 94,775 | -     | 4,009  | 0,117  | 0,006  | 0,009 | 1,143 | -     | 0,198 | -     | 0,988 |
| CLIFF  | SI2NG   | -1029,34 | 2074,68 | 294,85 | 12,253 | 1,702  | 27,521 | 98,361 | 0,119 | -      | -      | -      | -     | 0,961 | -     | -     | 0,448 | 0,989 |
| CLIFF  | SC2NG   | -1028,00 | 2078,00 | 272,58 | 10,968 | 4,458  | 20,293 | 49,353 | 0,105 | 0,122  | 0,000  | -      | -     | 0,220 | 0,892 | -     | 0,482 | 0,988 |
| CLIFF  | IM2NG   | -1036,39 | 2092,77 | 293,76 | 5,238  | 2,869  | 26,849 | 46,905 | 0,101 | 0,120  | 0,000  | -      | -     | 0,971 | -     | -     | 0,437 | 0,987 |
| CLIFF  | AM2mG   | -1038,86 | 2101,73 | 284,22 | 4,711  | 0,486  | 38,158 | 37,117 | -     | 0,374  | 0,002  | 0,377  | 4,215 | 0,139 | 0,856 | 0,778 | -     | 0,986 |
| CLIFF  | AM2N2mG | -1073,93 | 2175,86 | 142,21 | 21,190 | 1,004  | 10,048 | 31,605 | 0,146 | 0,000  | 0,002  | 15,277 | 6,429 | 0,455 | 0,669 | 0,252 | 0,051 | 0,988 |
| CLIFF  | IMG     | -1091,86 | 2199,73 | 301,48 | 5,015  | 0,233  | 21,076 | 99,793 | -     | 0,055  | 0,094  | -      | -     | 0,906 | -     | -     | -     | 0,987 |
| CLIFF  | SI2N    | -1095,88 | 2203,76 | 271,21 | 97,226 | 24,494 | -      | 0,392  | 0,042 | -      | -      | -      | -     | 1,063 | -     | -     | -     | 0,985 |
| CLIFF  | AM2NG   | -1091,63 | 2205,26 | 289,56 | 19,034 | 0,589  | 5,755  | 59,724 | 0,088 | 6,293  | 0,000  | -      | -     | 0,066 | 0,938 | -     | 0,101 | 0,988 |
| CLIFF  | AM2N2m  | -1091,48 | 2206,96 | 143,19 | 21,736 | 13,935 | -      | -      | 0,046 | 0,287  | 0,099  | 0,009  | 0,130 | 0,912 | 0,001 | 0,064 | 0,492 | 0,980 |
| CLIFF  | SIG     | -1100,99 | 2213,98 | 300,46 | 4,248  | 0,345  | 72,363 | 99,879 | -     | -      | -      | -      | -     | 0,913 | -     | -     | -     | 0,987 |
| CLIFF  | AMG     | -1101,53 | 2221,07 | 285,14 | 34,177 | 0,366  | 1,789  | 99,311 | -     | 0,033  | 0,033  | -      | -     | 0,000 | 0,978 | -     | -     | 0,988 |
| CLIFF  | SC2N    | -1101,93 | 2221,86 | 247,19 | 15,254 | 12,250 | -      | -      | 0,101 | 0,404  | 0,110  | -      | -     | 0,828 | 0,271 | -     | 0,371 | 0,972 |
| CLIFF  | IM2N    | -1107,36 | 2230,72 | 259,60 | 21,504 | 10,229 | -      | -      | 0,100 | 0,172  | 0,000  | -      | -     | 1,020 | -     | -     | 0,379 | 0,975 |
| CLIFF  | AM2N    | -1111,39 | 2240,77 | 281,61 | 0,011  | 10,003 | -      | -      | 0,100 | 0,276  | 0,000  | 0,894  | 0,011 | 0,400 | 0,972 | -     | -     | -     |
| CLIFF  | AM2m    | -1111,28 | 2242,56 | 334,70 | 99,474 | 1,311  | -      | -      | -     | 25,355 | 4,612  | 0,015  | 0,140 | 1,799 | 0,250 | 0,549 | -     | 0,930 |
| CLIFF  | SC2m    | -1115,42 | 2250,84 | 281,31 | 93,969 | 0,859  | -      | -      | -     | 0,097  | 29,512 | 0,206  | 0,325 | 1,061 | 0,091 | 0,408 | -     | 0,985 |
| CLIFF  | IM2m    | -1122,31 | 2262,61 | 282,45 | 99,741 | 0,861  | -      | -      | -     | 0,000  | 27,993 | 0,032  | 0,106 | 1,157 | -     | 0,409 | -     | 0,986 |
| CLIFF  | SC2N2m  | -1119,83 | 2263,66 | 128,66 | 29,411 | 7,063  | -      | -      | 0,110 | 0,122  | 0,000  | 0,000  | 7,562 | 0,774 | 0,229 | 0,630 | 0,499 | 0,978 |
| CLIFF  | SC      | -1295,69 | 2605,39 | 281,52 | 51,086 | 1,409  | -      | -      | -     | 0,135  | 0,610  | -      | -     | 0,895 | 0,152 | -     | -     | 0,982 |
| CLIFF  | AM      | -1303,73 | 2621,46 | 210,36 | 3,525  | 85,684 | -      | -      | -     | 0,013  | 34,426 | -      | -     | 0,211 | 1,248 | -     | -     | 0,970 |
| CLIFF  | IM      | -1314,32 | 2640,65 | 284,34 | 54,462 | 1,573  | -      | -      | -     | 0,043  | 0,149  | -      | -     | 1,026 | -     | -     | -     | 0,983 |
| CLIFF  | SCG     | -1319,33 | 2656,67 | 292,73 | 51,314 | 1,755  | 6,932  | 34,177 | -     | 0,015  | 0,197  | -      | -     | 0,917 | 0,021 | -     | -     | 0,984 |
| CLIFF  | SI      | -1325,45 | 2658,89 | 295,08 | 50,878 | 1,828  | -      | -      | -     | -      | -      | -      | -     | 0,907 | -     | -     | -     | 0,984 |



**Supplementary Table S4. Confidence intervals of contemporary populations following demographic expansion.**

The confidence interval of the product  $N_n \times b_n$ , was determined for each species for the best model, using the lower and upper bounds of the confidence intervals obtained for parameters  $N_n$  and  $b_n$  from Supplementary Table 1.

| LAKE        | MODEL   | <i>N1b1</i>   | <i>N1b2</i>  |
|-------------|---------|---------------|--------------|
| Témiscouata | SC2mG   | [0;12965.4]   | [0;2741.04]  |
| East        | SC2N2mG | [0;994.65]    | [0;279.48]   |
| Indian      | SC2N2mG | [37.26;39.54] | [0;23.22]    |
| Cliff       | SC2N2mG | [39.71;182.4] | [6.76;31.22] |
